# Supplementary material for: Water-borne foldable polymer solar cells: one-step transferring free-standing polymer films onto woven fabric electrodes
Source: Royal Society of Chemistry journal article supplement (doi:10.1039/c6ta08309a), 2016-12-12
Supplement: c6ta08309a1.pdf [file c6ta08309a1.pdf]

*Supplementary Information*

Water-born foldable polymer solar cells: one-step transferring free-standing polymer films onto woven fabric electrodes

**Hongyu Zhen\*<sup>ab</sup>, Kan Li<sup>bc</sup>, Chaojian Chen<sup>b</sup>, You Yu<sup>bd</sup>, Zijian Zheng\*<sup>b</sup>, Qidan Ling<sup>a</sup>**

<sup>a</sup> College of Materials Science and Engineering, Fujian Key Laboratory of Polymer Materials, Fujian Normal University, Fuzhou 350007, China.

<sup>b</sup> Nanotechnology Center, Institute of Textiles and Clothing, the Hong Kong Polytechnic University, Hong Kong SAR, China.

<sup>c</sup> College of Science, Center for optics & optoelectronics research, Zhejiang University of Technology, Hangzhou 310014, China.

<sup>d</sup> College of Chemistry & Materials Science, Northwest University, Xi'an, 710127, Shanxi, China

\*Corresponding authors.

*E-mail:* [rainy\\_ch@126.com](mailto:rainy_ch@126.com); [zijian.zheng@polyu.edu.hk](mailto:zijian.zheng@polyu.edu.hk)

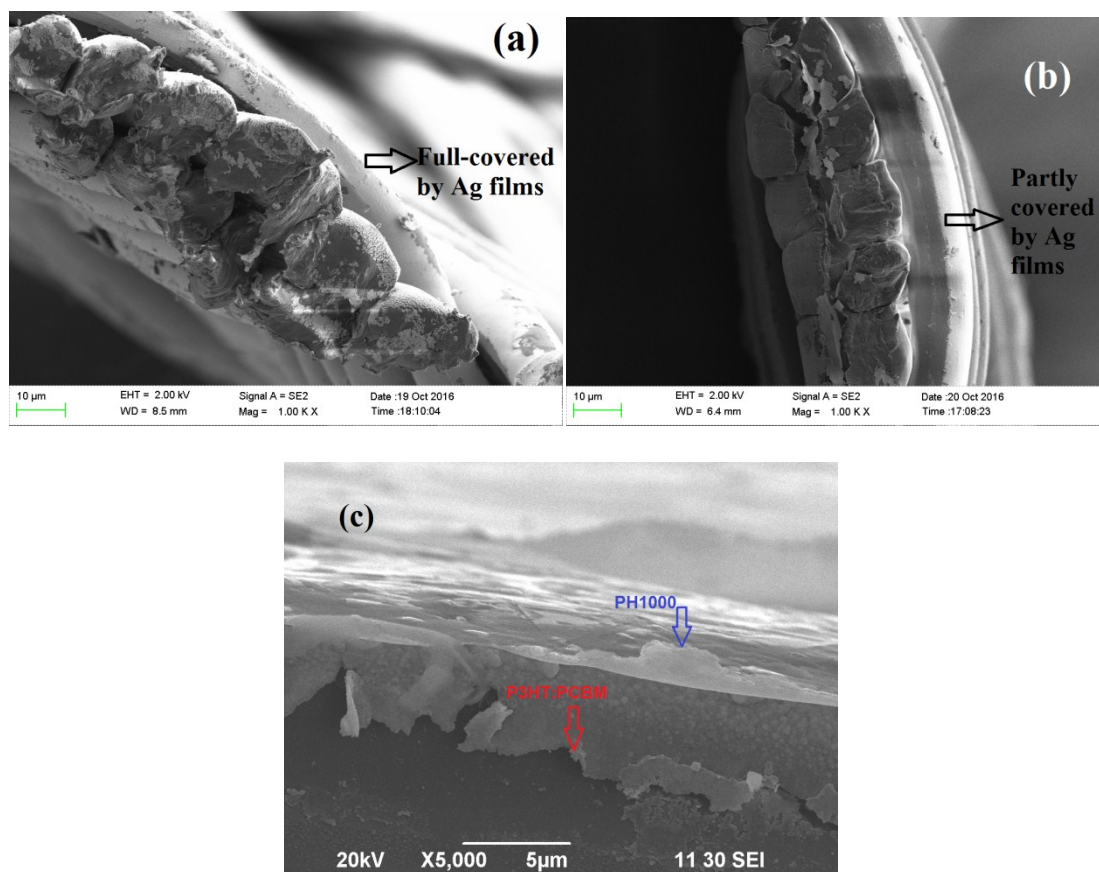

Figure S1 Cross-sectional SEM images of (a) Ag electrodes fabricated on fabric A by PAMD; (b) Ag electrodes fabricated on fabric A by vacuum deposition and (c) the PSCs on fabricated on fabric A.

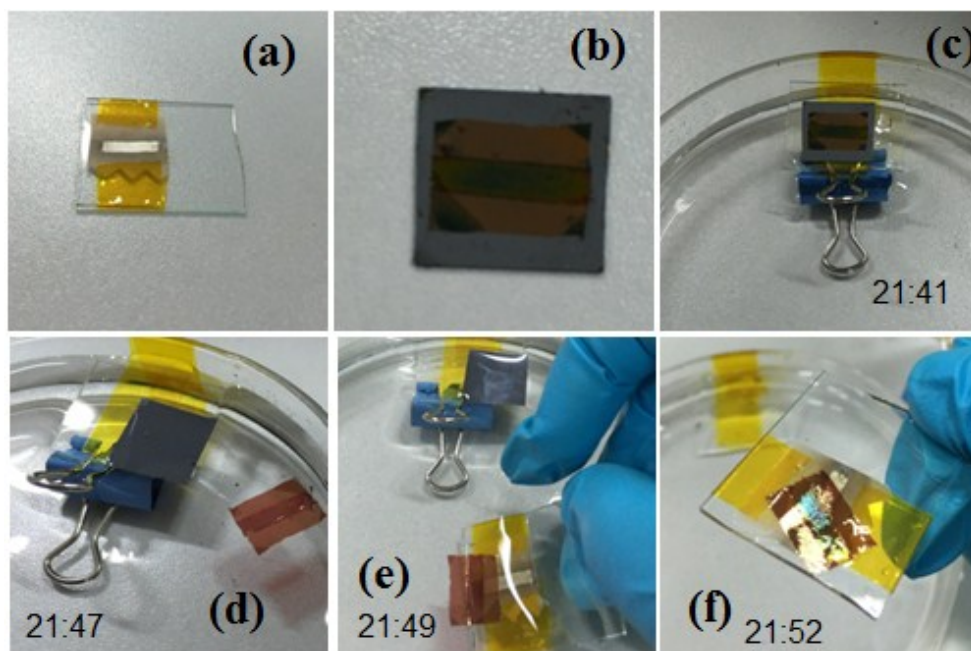

Figure S2 Photographs of wet-transfer process (a) fabric Ag electrode was pasted on a piece of glass; (b) the bi-layer films P3HT:PCBM/PH1000 was pattern by swab; (c) silicon/PSSNa/ P3HT:PCBM /PH1000 was put into water with PH1000 untouched with water; (d) free-standing P3HT:PCBM /PH1000 floated on water surface after PSSNa dissolved into water; (e) and (f) the lamination of fabric Ag electrode with free-standing P3HT:PCBM /PH1000 in water.

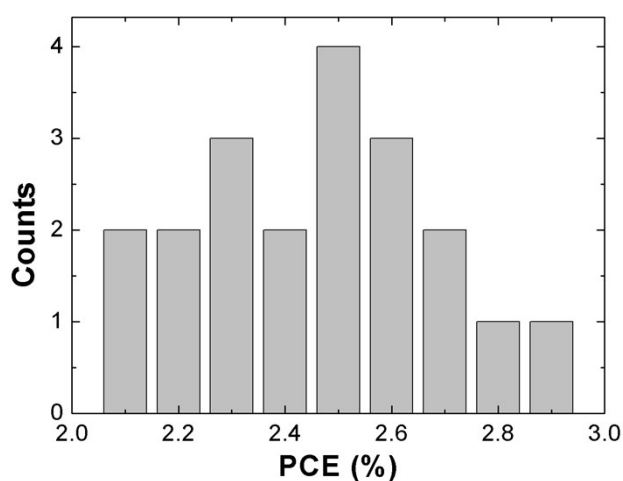

Figure S3 Distribution of the PCEs from 20 PSCs on fabric A.
